# Supplementary material
Source: PubMed Central journal article supplement (PMC10072128)
Supplement: NIHMS1881498-supplement-1.pdf [file NIHMS1881498-supplement-1.pdf]

# THE LANCET

## Diabetes & Endocrinology

### Supplementary appendix

This appendix formed part of the original submission. We post it as supplied by the authors.

Supplement to: Flood D, Guwatudde D, Damasceno A, et al. Maximising use of population data on cardiometabolic diseases. *Lancet Diabetes Endocrinol* 2022; published online Jan 10. [https://doi.org/10.1016/S2213-8587\(21\)00328-4](https://doi.org/10.1016/S2213-8587(21)00328-4).

## HPACC members

David Flood<sup>1-3</sup>, David Guwatudde<sup>4</sup>, Albertino Damasceno<sup>5-7</sup>, Krishna K. Aryal<sup>8</sup>, Brice Wilfried Bicaba<sup>9</sup>, Pascal Bovet<sup>10,11</sup>, Garry Brian<sup>12</sup>, Maria Dorobantu<sup>13</sup>, Farshad Farzadfar<sup>14</sup>, Mongal Singh Gurung<sup>15</sup>, Corine Houehanou<sup>16</sup>, Jutta Jorgensen<sup>17</sup>, Khem Bahadur Karki<sup>18</sup>, Demetre Labadarios<sup>19</sup>, Nuno Lunet<sup>5,20</sup>, Joao Martins<sup>21</sup>, Mary Mayige<sup>22</sup>, Omar Mwalim<sup>23,24</sup>, Kibachio Joseph Mwangi<sup>25,26</sup>, Bolormaa Norov<sup>27</sup>, Rebekka Rühle<sup>28</sup>, Sahar Saeedi Moghaddam<sup>29</sup>, Jacqueline A. Seiglie<sup>30,31</sup>, Abba M. Sibai<sup>32</sup>, Bahendeka Karaireho Silver<sup>33</sup>, Lela Sturua<sup>34</sup>, Adil Supiyev<sup>35</sup>, Zhaxybay Zhumadilov<sup>36</sup>, Maja E. Marcus<sup>28</sup>, Kehinde D. Whyte-Ilori<sup>37</sup>, Michaela Theilmann<sup>38</sup>, Lindsay Jaacks<sup>39</sup>, Pascal Geldsetzer<sup>38,40</sup>, Sebastian Vollmer<sup>28</sup>, Till W. Bärnighausen<sup>38,41,42</sup>, Rifat Atun<sup>43,44</sup>, Jennifer Manne-Goehler<sup>45,46</sup>, Justine I. Davies<sup>47-49</sup>

## Affiliations

<sup>1</sup>Division of Hospital Medicine, Department of Medicine, University of Michigan, Ann Arbor, Michigan, USA; <sup>2</sup>Center for Indigenous Health Research, Wuqu' Kawoq, Tecpán, Guatemala; <sup>3</sup>Research Center for the Prevention of Chronic Diseases, Institute of Nutrition of Central America and Panama, Guatemala City, Guatemala; <sup>4</sup>Department of Epidemiology and Biostatistics, School of Public Health, Makerere University, Kampala, Uganda; <sup>5</sup>Department of Public and Forensic Health Sciences and Medical Education, Faculty of Medicine, University of Porto, Porto, Portugal; <sup>6</sup>EPIUnit, Institute of Public Health, University of Porto, Porto, Portugal; <sup>7</sup>Faculty of Medicine, Eduardo Mondlane University, Maputo, Mozambique; <sup>8</sup>Public Health Promotion and Development Organization, Kathmandu, Nepal; <sup>9</sup>Institut National de Santé Publique, Burkina Faso; <sup>10</sup>Ministry of Health, Victoria, Seychelles; <sup>11</sup>University Center for Primary Health and Public Health, Lausanne, Switzerland; <sup>12</sup>The Fred Hollows Foundation New Zealand; <sup>13</sup>University of Medicine and Pharmacy Carol Davila, Bucharest, Romania; <sup>14</sup>Non-Communicable Diseases Research Center, Endocrinology and Metabolism Population Sciences Institute, Tehran University of Medical Sciences, Tehran, Iran; <sup>15</sup>Health Research and Epidemiology Unit, Ministry of Health, Thimphu, Bhutan; <sup>16</sup>Laboratory of Epidemiology of Chronic and Neurological Diseases, Faculty of Health Sciences, University of Abomey-Calavi, Cotonou, Benin; <sup>17</sup>Department of Public Health, University of Copenhagen, Copenhagen, Denmark; <sup>18</sup>Department of Community Medicine and Public Health, Institute of Medicine, Tribhuvan University, Kathmandu, Nepal; <sup>19</sup>Faculty of Medicine and Health Sciences, Stellenbosch University, Stellenbosch, South Africa; <sup>20</sup>EPIUnit Institute of Public Health, University of Porto, Porto, Portugal; <sup>21</sup>Faculty of Medicine and Health Sciences, National University of East Timor, Dili, Timor-Leste; <sup>22</sup>National Institute for Medical Research, Dar es Salaam, Tanzania; <sup>23</sup>Ministry of Health and Social Welfare, Elderly, Gender and Children, Zanzibar, Tanzania; <sup>24</sup>Bergen Centre for Ethics and Priority Setting (BCEPS), Department of Global Public Health and Primary Care, University of Bergen, Norway; <sup>25</sup>Division of Non-Communicable Diseases, Ministry of Health, Nairobi, Kenya; <sup>26</sup>Faculté de Médecine, Université de Genève, Geneva, Switzerland; <sup>27</sup>National Center for Public Health, Ulaanbaatar, Mongolia; <sup>28</sup>Department of Economics and Centre for Modern Indian Studies, University of Goettingen, Göttingen, Germany; <sup>29</sup>Endocrinology and Metabolism Research Center, Endocrinology and Metabolism Clinical Sciences Institute, Tehran University of Medical Sciences, Tehran, Iran; <sup>30</sup>Diabetes Unit, Massachusetts General Hospital, Boston, USA; <sup>31</sup>Department of Medicine, Harvard Medical School, Boston, USA; <sup>32</sup>Epidemiology and Population Health Department, Faculty of Health Sciences American University of Beirut, Beirut, Lebanon; <sup>33</sup>Uganda Martyrs University | Saint Francis Hospital Nsambya, Kampala, Uganda; <sup>34</sup>Non-Communicable Disease Department, National Center for Disease Control and Public Health, Tbilisi, Georgia; <sup>35</sup>Laboratory of Epidemiology and Public Health, Center for Life Sciences, Nazarbayev University, Astana, Kazakhstan; <sup>36</sup>Nazarbayev University School of Medicine, Nur-Sultan,

52 Kazakhstan; <sup>37</sup>School of Medicine, University of Leeds, Leeds, West Yorkshire, United  
53 Kingdom; <sup>38</sup>Heidelberg Institute of Global Health, Heidelberg University and University Hospital,  
54 Heidelberg, Germany; <sup>39</sup>Global Academy of Agriculture and Food Security, The University of  
55 Edinburgh, Midlothian, United Kindom; <sup>40</sup>Division of Primary Care and Population Health,  
56 Stanford University; <sup>41</sup>Africa Health Research Institute, Somkhele, South Africa; <sup>42</sup>Harvard  
57 Center for Population and Development Studies, Cambridge, USA; <sup>43</sup>Department of Global  
58 Health and Population, Harvard T.H. Chan School of Public Health, Harvard University, Boston,  
59 MA, USA; <sup>44</sup>Department of Global Health and Social Medicine, Harvard Medical School,  
60 Harvard University, Boston, MA, USA; <sup>45</sup>Division of Infectious Diseases, Brigham and Women's  
61 Hospital, Harvard Medical School, Boston, MA, USA; <sup>46</sup>Medical Practice Evaluation Center,  
62 Massachusetts General Hospital, Harvard Medical School, Boston, MA, USA; <sup>47</sup>Institute for  
63 Applied Health Research, University of Birmingham, UK; <sup>48</sup>Centre for Global Surgery,  
64 Department of Global Health, Stellenbosch University, Cape Town, South Africa; <sup>49</sup>Medical  
65 Research Council/Wits University Rural Public Health and Health Transitions Research Unit,  
66 Faculty of Health Sciences, School of Public Health, University of the Witwatersrand,  
67 Johannesburg, South Africa
